# Supplementary material for: Evidence-Based Recommendations to Improve the Safe Use of Drugs in Patients with Liver Cirrhosis
Source: Springer Nature journal article supplement (doi:10.1007/s40264-017-0635-x), 2018-01-12
Supplement: MOESM1 [file 24118060]

**Evidence-based recommendations to improve the safe use of drugs in patients with liver cirrhosis***Drug safety*

**Authors:** Rianne A. Weersink, Margriet Bouma, David M. Burger, Joost P.H. Drenth, S. Froukje Harkes-Idzinga, Nicole G.M. Hunfeld, Herold J. Metselaar, Margje H. Monster-Simons, Katja Taxis, Sander D. Borgsteede

**Correspondence to:** Rianne A. Weersink. Affiliations: the Health Base Foundation and the University of Groningen. Email: rianne.weersink@healthbase.nl

**Supplementary Table 1. Overview of recommendations in which the safety class is depending on the severity of liver cirrhosis (Child-Pugh classification [16]).**

| Drug                 | Severity of liver cirrhosis |                           |                           |
|----------------------|-----------------------------|---------------------------|---------------------------|
|                      | Child-Pugh A                | Child-Pugh B              | Child-Pugh C              |
| Alfentail            | No additional risks known   | No additional risks known | Unknown                   |
| Alogliptin           | No additional risks known   | No additional risks known | Unknown                   |
| Benazepril           | No additional risks known   | Additional risks known    | Unsafe                    |
| Bezafibrate          | No additional risks known   | Unknown                   | Unknown                   |
| Canagliflozin        | No additional risks known   | No additional risks known | Unknown                   |
| Candesartan          | No additional risks known   | Additional risks known    | Unsafe                    |
| Captopril            | No additional risks known   | Additional risks known    | Unsafe                    |
| Clopidogrel          | No additional risks known   | No additional risks known | Unsafe                    |
| Codeine              | Additional risks known      | Unsafe                    | Unsafe                    |
| Dasabuvir            | No additional risks known   | Additional risks known    | Unsafe                    |
| Dipyridamole         | No additional risks known   | Additional risks known    | Additional risks known    |
| Domperidone          | No additional risks known   | No additional risks known | Unsafe                    |
| Elbasvir/grazoprevir | No additional risks known   | Unsafe                    | Unsafe                    |
| Enalapril            | No additional risks known   | Additional risks known    | Unsafe                    |
| Eprosartan           | No additional risks known   | Additional risks known    | Unsafe                    |
| Ezetemibe            | No additional risks known   | Unsafe                    | Unsafe                    |
| Felodipine           | No additional risks known   | No additional risks known | Unsafe                    |
| Fentanyl             | Safe                        | Safe                      | No additional risks known |

|                                       |                           |                           |                        |
|---------------------------------------|---------------------------|---------------------------|------------------------|
| Fluvastatin                           | No additional risks known | No additional risks known | Unknown                |
| Fosinopril                            | No additional risks known | Additional risks known    | Unsafe                 |
| Gemfibrozil                           | No additional risks known | Unknown                   | Unknown                |
| Interferon alfa-2a                    | Additional risks known    | Unsafe                    | Unsafe                 |
| Interferon alfa-2b                    | Additional risks known    | Unsafe                    | Unsafe                 |
| Irbesartan                            | No additional risks known | Additional risks known    | Unsafe                 |
| Lercanidipine                         | Unknown                   | Unknown                   | Unsafe                 |
| Lisinopril                            | No additional risks known | Additional risks known    | Unsafe                 |
| Lomitapide                            | Unknown                   | Unsafe                    | Unsafe                 |
| Losartan                              | No additional risks known | Additional risks known    | Unsafe                 |
| Metoprolol                            | No additional risks known | No additional risks known | Unsafe                 |
| Mycophenolate mofetil                 | No additional risks known | No additional risks known | Unknown                |
| Olmесartan                            | No additional risks known | Additional risks known    | Unsafe                 |
| Ombitasvir/paritaprevir/<br>ritonavir | No additional risks known | Additional risks known    | Unsafe                 |
| Omeprazole                            | No additional risks known | No additional risks known | Unsafe                 |
| Peginterferon alfa-2a                 | Additional risks known    | Unsafe                    | Unsafe                 |
| Peginterferon alfa-2b                 | Additional risks known    | Unsafe                    | Unsafe                 |
| Perindopril                           | No additional risks known | Additional risks known    | Unsafe                 |
| Pethidine                             | No additional risks known | No additional risks known | Unknown                |
| Prasugrel                             | No additional risks known | No additional risks known | Unknown                |
| Pravastatin                           | No additional risks known | No additional risks known | Unknown                |
| Quinapril                             | Unknown                   | Additional risks known    | Unsafe                 |
| Rabeprazole                           | No additional risks known | No additional risks known | Unsafe                 |
| Ramipril                              | No additional risks known | Additional risks known    | Unsafe                 |
| Repaglinide                           | Unknown                   | Additional risks known    | Additional risks known |
| Ribavirin                             | No additional risks known | Additional risks known    | Additional risks known |
| Rosuvastatin                          | No additional risks known | No additional risks known | Unknown                |

|                             |                           |                           |                        |
|-----------------------------|---------------------------|---------------------------|------------------------|
| Simeprevir                  | No additional risks known | Unsafe                    | Unsafe                 |
| Simvastatin                 | Safe                      | Safe                      | Unknown                |
| Sitagliptin                 | No additional risks known | No additional risks known | Unknown                |
| Tapentadol                  | Unknown                   | Unknown                   | Unsafe                 |
| Telmisartan                 | No additional risks known | Additional risks known    | Unsafe                 |
| Ticagrelor                  | No additional risks known | Unknown                   | Unknown                |
| Tigecycline                 | No additional risks known | No additional risks known | Additional risks known |
| Trandolapril                | Unknown                   | Additional risks known    | Unsafe                 |
| Valsartan                   | No additional risks known | Additional risks known    | Unsafe                 |
| Verapamil (IV) <sup>a</sup> | No additional risks known | No additional risks known | Unsafe                 |
| Verapamil (PO) <sup>a</sup> | No additional risks known | No additional risks known | Unsafe                 |
| Zofenopril                  | Unknown                   | Additional risks known    | Unsafe                 |

IV: intravenous, PO: per os.

a. Safety class of verapamil is similar for intravenous and oral administration, dosing advice is different.

**Evidence-based recommendations to improve the safe use of drugs in patients with liver cirrhosis***Drug safety*

**Authors:** Rianne A. Weersink, Margriet Bouma, David M. Burger, Joost P.H. Drenth, S. Froukje Harkes-Idzinga, Nicole G.M. Hunfeld, Herold J. Metselaar, Margje H. Monster-Simons, Katja Taxis, Sander D. Borgsteede

**Correspondence to:** Rianne A. Weersink. Affiliations: the Health Base Foundation and the University of Groningen. Email: rianne.weersink@healthbase.nl

**Supplementary Table 2. Recommended dosing advice for 67 drugs when used in patients with liver cirrhosis.**

| <b>Drug</b>          | <b>Dosing advice</b>                                                                                                                               |
|----------------------|----------------------------------------------------------------------------------------------------------------------------------------------------|
| Acenocoumarol        | Recommended initial dosing: day 1: 4 mg or 3 mg; day 2: 2 mg; day 3: 1 mg; day 4: test INR                                                         |
| Acetylsalicylic acid | Use no more than the dose used for platelet aggregation inhibition                                                                                 |
| Amlodipine           | CTP A: no dose adjustment needed<br>CTP B: start with 50% of the normal dose <sup>a</sup><br>CTP C: start with 25% of the normal dose <sup>a</sup> |
| Benazepril           | CTP A+B: start as low as possible <sup>a</sup><br>CTP C: unsafe                                                                                    |
| Bisoprolol           | CTP A+B: no dose adjustment needed<br>CTP C: use a maximum of 10 mg daily                                                                          |
| Buprenorphine        | CTP A: no dose adjustment needed<br>CTP B+C: start with 50% of the normal dose <sup>a</sup>                                                        |
| Candesartan          | CTP A+B: start with 4 mg once daily <sup>a</sup><br>CTP C: unsafe                                                                                  |
| Captopril            | CTP A+B: start as low as possible <sup>a</sup><br>CTP C: unsafe                                                                                    |
| Carbasalate calcium  | Use no more than the dose used for platelet aggregation inhibition                                                                                 |
| Carvedilol           | CTP A: no dose adjustment needed<br>CTP B: start with 50% of the normal dose <sup>a</sup><br>CTP C: start with 25% of the normal dose <sup>a</sup> |
| Clindamycin          | CTP A: no dose adjustment needed<br>CTP B+C: use a dosing interval of 8 hours                                                                      |
| Dalteparin           | Give twice daily if used in therapeutic dose                                                                                                       |
| Dapagliflozin        | CTP A+B: no dose adjustment needed<br>CTP C: start with 5 mg, increase to a maximum of 10 mg once daily.                                           |
| Diltiazem            | start with 50% of the normal dose <sup>a</sup>                                                                                                     |
| Domperidone          | CTP A: no dose adjustment needed<br>CTP B: use a third of the normal dose<br>CTP C: unsafe                                                         |
| Enalapril            | CTP A+B: start as low as possible <sup>a</sup><br>CTP C: unsafe                                                                                    |
| Enoxaparin           | Give twice daily if used in therapeutic dose                                                                                                       |
| Esomeprazole         | CTP A+B: no dose adjustment needed<br>CTP C: use a maximum of 20 mg once daily                                                                     |
| Eprosartan           | CTP A+B: start as low as possible <sup>a</sup><br>CTP C: unsafe                                                                                    |
| Felodipine           | CTP A+B: start with 50% of the normal dose <sup>a</sup><br>CTP C: unsafe                                                                           |

|                    |                                                                                                                                                 |
|--------------------|-------------------------------------------------------------------------------------------------------------------------------------------------|
| Fentanyl           | start with 50% of the normal dose <sup>a</sup>                                                                                                  |
| Fluvastatin        | CTP A+B: start with 20 mg once daily <sup>a</sup><br>CTP C: unknown                                                                             |
| Fosinopril         | CTP A+B: start as low as possible <sup>a</sup><br>CTP C: unsafe                                                                                 |
| Glibenclamide      | Start as low as possible <sup>a</sup>                                                                                                           |
| Gliclazide         | Start as low as possible <sup>a</sup>                                                                                                           |
| Glimepiride        | Start as low as possible <sup>a</sup>                                                                                                           |
| Heparin            | Aim at an aPTT 1.5-2.5 times prolonged                                                                                                          |
| Hydromorphone (PO) | CTP A+B: start with 25% of the normal dose <sup>a</sup><br>CTP C: unknown                                                                       |
| Irbesartan         | CTP A+B: start as low as possible <sup>a</sup><br>CTP C: unsafe                                                                                 |
| Labetalol (PO)     | Start with 50% of the normal dose <sup>a</sup>                                                                                                  |
| Lacidipine         | Start with 2 mg once daily <sup>a</sup>                                                                                                         |
| Lisinopril         | CTP A+B: start as low as possible <sup>a</sup><br>CTP C: unsafe                                                                                 |
| Lomitapide         | CTP A: start with 5 mg once daily, increase to a maximum of 40 mg per day<br>CTP B+C: unsafe                                                    |
| Losartan           | CTP A+B: start with 12.5 mg once daily <sup>a</sup><br>CTP C: unsafe                                                                            |
| Metoclopramide     | CTP A: no dose adjustment needed<br>CTP B+C: use 50% of the normal dose <sup>a</sup>                                                            |
| Metoprolol         | CTP A: no dose adjustment needed<br>CTP B: start with a third of the normal dose <sup>a</sup><br>CTP C: unsafe                                  |
| Morphine (PO)      | CTP A+B: start with 50% of the normal dose <sup>a</sup><br>CTP C: start with 25% of the normal dose <sup>a</sup>                                |
| Morphine (IV)      | CTP A: no dose adjustment needed<br>CTP B+C: double the dosing interval <sup>a</sup>                                                            |
| Nadoparin          | Give twice daily if used in therapeutic dose                                                                                                    |
| Nifedipine         | CTP A+B: start with 50% of the normal dose <sup>a</sup><br>CTP C: start with 50% of the normal dose and double the dosing interval <sup>a</sup> |
| Nimodipine (PO)    | Start with 30 mg three times daily <sup>a</sup>                                                                                                 |
| Omeprazole         | CTP A+B: use a maximum of 20 mg once daily<br>CTP C: unsafe                                                                                     |
| Olmесartan         | CTP A: start with 10 mg once daily <sup>a</sup><br>CTP B: start with 10 mg once daily, increase to a maximum of 20 mg per day<br>CTP C: unsafe  |
| Oxycodone          | CTP A+B: start with 50% of the normal dose <sup>a</sup><br>CTP C: start with 50% of the normal dose and double the dosing interval <sup>a</sup> |
| Perindopril        | CTP A+B: start as low as possible <sup>a</sup><br>CTP C: unsafe                                                                                 |
| Phenprocoumon      | Recommended initial dosing: day 1: 9 mg or 6 mg; day 2: 3 mg; day 3: 1.5 mg; day 4: test INR                                                    |
| Pioglitazone       | Start with 15 mg once daily, increase to a maximum of 45 mg                                                                                     |
| Piritramide        | Use a maximum of 10 mg at once                                                                                                                  |
| Pravastatin        | CTP A+B: Start with 10 mg once daily <sup>a</sup><br>CTP C: unknown                                                                             |

|                |                                                                                                                                             |
|----------------|---------------------------------------------------------------------------------------------------------------------------------------------|
| Propranolol    | Start with a maximum of 20 mg three times daily <sup>a</sup>                                                                                |
| Quinapril      | CTP A+B: start as low as possible <sup>a</sup><br>CTP C: unsafe                                                                             |
| Rabeprazole    | CTP A: start with 10 mg once daily, use a maximum of 20 mg per day<br>CTP B: use a maximum of 10 mg per day<br>CTP C: unsafe                |
| Ramipril       | CTP A+B: start as low as possible <sup>a</sup><br>CTP C: unsafe                                                                             |
| Repaglinide    | CTP A: Start with 50% of the normal dose <sup>a</sup><br>CTP B+C : Start with 50% of the normal dose, increase to a maximum of 4 mg per day |
| Rosuvastatin   | CTP A+B: Start with 5 mg once daily <sup>a</sup><br>CTP C: unknown                                                                          |
| Roxithromycin  | CTP A+B: no dose adjustment needed<br>CTP C: use 150 mg per day                                                                             |
| Simvastatin    | CTP A+B: Start with 20 mg once daily <sup>a</sup><br>CTP C: unknown                                                                         |
| Tapentadol     | CTP A+B: start with 50 mg three times daily or 50 mg retard once daily <sup>a</sup><br>CTP C: unsafe                                        |
| Telmisartan    | CTP A+B: start with 20 mg once daily, increase to a maximum of 40 mg per day <sup>a</sup><br>CTP C: unsafe                                  |
| Tigecycline    | CTP A+B: no dose adjustment needed<br>CTP C: reduce maintenance dose to 25 mg twice daily                                                   |
| Tolbutamide    | Start as low as possible <sup>a</sup>                                                                                                       |
| Tramadol       | CTP A: start with 50 mg every 12 hours <sup>a</sup><br>CTP B+C: start with 25 mg, increase to a maximum of 100 mg every 12 hours            |
| Trandolopril   | CTP A+B: start as low as possible <sup>a</sup><br>CTP C: unsafe                                                                             |
| Valsartan      | CTP A+B: start with 40 mg once daily, increase to a maximum of 80 mg per day<br>CTP C: unsafe                                               |
| Verapamil (PO) | CTP A+B: start with 40 mg twice daily and increase with a dosing interval of 12 hours<br>CTP C: unsafe                                      |
| Verapamil (IV) | CTP A+B: use a third of the normal maintenance dose<br>CTP C: unsafe                                                                        |
| Zofenopril     | CTP A+B: start as low as possible <sup>a</sup><br>CTP C: unsafe                                                                             |

CTP: Child-Pugh class, IV: intravenous, PO: per os.

a. Increase the dose carefully according to clinical response and adverse drug reactions.
